# Supplementary material for: Unveiling the antioxidant and anti-epileptic potential of Castanea sativa against pentylenetetrazole in mice: a comparative LC-MS analysis of two ethanol-based fractions
Source: Royal Society of Chemistry journal article supplement (doi:10.1039/d6ra02693a), 2026-06-03
Supplement: d6ra02693a1.pdf [file d6ra02693a1.pdf]

## Unveiling Antioxidant and Anti-Epileptic Potential of *Castanea sativa* against pentylenetetrazole in mice: A Comparative LC-MS Analysis of Two Ethanol-Based Fractions

Abeer Salama<sup>a\*</sup>, Rasha M.M. Mohasib<sup>b</sup>, Hagar H. Mourad<sup>c</sup>, Nesrine M. Hegazi<sup>d</sup>, Tarik A. Mohamed<sup>e\*</sup>, Mohamed-Elamir F. Hegazy<sup>e</sup>

<sup>a</sup>Pharmacology Department, Medical Research and Clinical Studies Institute, National Research Centre (ID: 60014618), Dokki, Cairo, Egypt.

<sup>b</sup>Plant Biochemistry Department, National Research Centre, 33 El-Bohouth St., Dokki, Giza 12622, Egypt

<sup>c</sup>Medical Physiology Department, Medical Research and Clinical Studies Institute, National Research Centre (ID: 60014618), Dokki, Giza, Egypt.

<sup>d</sup>Phytochemistry and Plant Systematics Department, National Research Centre, 33 El-Bohouth St., Dokki, Giza 12622, Egypt

<sup>e</sup>Chemistry of Medicinal Plants Department, National Research Centre, 33 El-Bohouth St., Dokki, Giza 12622, Egypt

**Corresponding Authors:** Tarik A. Mohamed, Email: [tarik.nrc83@yahoo.com](mailto:tarik.nrc83@yahoo.com), (T.A.M.), Tel.: +20-11-27539989; Abeer Salama, Email: [berrotec@yahoo.com](mailto:berrotec@yahoo.com), (A.S.), Tel.: +20-10 03793622.

### Abstract

Epilepsy is a chronic neurological disorder in which oxidative stress and neuroinflammation play key pathogenic roles. There is growing interest in natural antioxidants with neuroprotective properties as complementary therapies. *Castanea sativa* (*C. sativa*) fruits, rich in phenolic acids and flavonoids, may offer such potential. The current study aimed to assess the effect of *Castanea sativa* fractions on pentylenetetrazol (PTZ)-induced epilepsy in mice via modulation of brain Gamma-Aminobutyric acid (GABA), Excitatory amino acid transporter 2 (EAAT2), Tumor Necrosis Factor- $\alpha$  (TNF- $\alpha$ ), and Malondialdehyde (MDA). Fruits were sequentially extracted using 70% and 100% ethanol to yield two fractions, which were phytochemically profiled via liquid chromatography–mass spectrometry (LC-MS). In vitro antioxidant capacity was assessed using DPPH, ABTS, and FRAP assays. In vivo efficacy was evaluated using a PTZ-induced seizure mouse model, with animals receiving vehicle, diazepam (1 mg/kg), or *C. sativa* extracts (400 mg/kg) orally, 30 minutes before PTZ injection (60 mg/kg). LC-MS profiling revealed over 70 metabolites, primarily phenolic acids (ellagic and gallic derivatives), flavonoid glycosides (quercetin and kaempferol), and several novel lignans and iridoid glycosides. The 100% ethanol fraction exhibited greater chemical diversity and peak intensities, alongside markedly stronger antioxidant activity, as reflected by lower IC<sub>50</sub> values (193.65  $\mu$ g/mL for DPPH and 128.87  $\mu$ g/mL for ABTS) and nearly fivefold higher FRAP capacity (26.59  $\mu$ g TE/mg fraction) compared to the 70% ethanol fraction. In vivo, the 100% extract delayed seizure onset 2.8-fold and reduced seizure duration and mortality, showing efficacy close to diazepam. Additionally, both extracts enhanced brain GABA, EAAT2, and reduced Glutathione (GSH) levels, while decreasing MDA, TNF- $\alpha$ , and Nuclear Factor kappa-B (NF- $\kappa$ B) compared to the PTZ group. These findings support the antioxidant and neuroprotective potential of *C. sativa* fruit extracts, especially the 100% ethanol fraction, highlighting their promise as functional food ingredients or nutraceutical adjuncts in epilepsy management.

**Keywords:** *Castanea sativa*, EAAT2, epilepsy, GABA, metabolomics, molecular networking

### Supplementary Tables

**Supplementary Table S1: Metabolites identified in the fruit of the studied *C. sativa* (100% ethanol and 70% ethanol fractions) via UPLC-HRMS/MS analysis. -: absent, tr: traces, +: present, ++: abundant, +++: major. \*Compounds previously isolated from *C. sativa* species, #: tentatively assigned new compounds**

| Compound class                  | No. | Rt (min) | m/z [M-H] <sup>-</sup> | MS <sup>2</sup>                                                     | m/z [M+H] <sup>+</sup>                        | MS <sup>2</sup>                | identification                 | Chemical formula                                                      | CS-70% | CS_100 |                     |
|---------------------------------|-----|----------|------------------------|---------------------------------------------------------------------|-----------------------------------------------|--------------------------------|--------------------------------|-----------------------------------------------------------------------|--------|--------|---------------------|
| Phenolic acid                   | 1.  | 0.87     | 169.0144               | 125, 79                                                             |                                               |                                | Gallic acid*                   | C <sub>7</sub> H <sub>6</sub> O <sub>5</sub><br>(1.38)                | +      | ++++   | <sup>1</sup> , GNPS |
| Alkaloid                        | 2.  | 0.87     |                        |                                                                     | 137.045                                       | 119, 111,<br>92, 82,<br>67, 55 | Hypoxanthine                   | C <sub>5</sub> H <sub>4</sub> N <sub>4</sub> O<br>(6.61)              | +      | +      |                     |
| Alkaloid                        | 3.  | 0.92     | 151.0258               | 108, 91,<br>65                                                      |                                               |                                | Xanthine                       | C <sub>5</sub> H <sub>4</sub> N <sub>4</sub> O <sub>2</sub><br>(1.32) | +      | +++    |                     |
| Phenolic acid                   | 4.  | 1.33     |                        |                                                                     | 166.0854<br>[M+NH <sub>3</sub> ] <sup>+</sup> | 120, 77                        | Cinnamic acid                  | C <sub>9</sub> H <sub>8</sub> O <sub>2</sub><br>(4.61)                | +      | +      |                     |
| Alkaloid                        | 5.  | 1.38     |                        |                                                                     | 120.08                                        | 103, 91,<br>77, 65, 51         | dihydroindole                  | C <sub>8</sub> H <sub>9</sub> N<br>(7.5)                              | +      | +      |                     |
| Phenolic acid                   | 6.  | 1.68     | 153.0191               | 125,<br>108, 95,<br>79, 67,<br>53                                   |                                               |                                | Dihydroxybenzoic acid          | C <sub>7</sub> H <sub>6</sub> O <sub>4</sub><br>(0.31)                | +      | ++++   |                     |
| Flavonoid                       | 7.  | 1.73     | 451.1227               | 289,<br>245,<br>203,<br>179,<br>165,<br>151,<br>137,<br>125,<br>109 |                                               |                                | (epi)catechin-O-hexoside       | C <sub>21</sub> H <sub>24</sub> O <sub>11</sub><br>(0.12)             | +      | +++    |                     |
| Sesquiterpenes (Apocarotenoids) | 8.  | 1.88     | 443.1885               | 71, 59                                                              |                                               |                                | dihydrophaseic acid-O-hexoside | C <sub>21</sub> H <sub>32</sub> O <sub>10</sub><br>(6.63)             | +      | -      |                     |

| Compound class    | No. | Rt (min) | m/z [M-H] <sup>-</sup> | MS <sup>2</sup>       | m/z [M+H] <sup>+</sup> | MS <sup>2</sup>                | identification                            | Chemical formula                                                        | CS-70% | CS_100 |                     |
|-------------------|-----|----------|------------------------|-----------------------|------------------------|--------------------------------|-------------------------------------------|-------------------------------------------------------------------------|--------|--------|---------------------|
| Amino acid        | 9.  | 2.09     | 203.0825               | 142, 116              |                        |                                | Tryptophan                                | C <sub>11</sub> H <sub>12</sub> N <sub>2</sub> O <sub>2</sub><br>(2.61) | +++    | +      |                     |
| Alkaloid          | 10. | 2.14     |                        |                       | 188.0698               | 143, 115, 91                   | Indole acrylate                           | C <sub>11</sub> H <sub>9</sub> NO <sub>2</sub><br>(4.38)                | +      | +      | 2                   |
| Alkaloid          | 11. | 2.24     |                        |                       | 162.0541               | 144, 134, 116, 106, 89, 77, 65 | quinolinediol                             | C <sub>9</sub> H <sub>7</sub> NO <sub>2</sub><br>(6.43)                 | +      | +      |                     |
| phenolic acid     | 12. | 2.55     |                        |                       | 137.0596               | 91, 65                         | Phenylacetic acid                         | C <sub>8</sub> H <sub>8</sub> O <sub>2</sub><br>(4.33)                  | +      | +      |                     |
| Aromatic          | 13. | 2.95     | 299.1123               | 119, 85, 71, 59       |                        |                                | (Hydroxyphenyl) ethyl hexose              | C <sub>14</sub> H <sub>20</sub> O <sub>7</sub><br>(2.83)                | +      | +      |                     |
| Aromatic          | 14. | 3.15     | 137.0239               | 108, 92               |                        |                                | Dihydroxybenzaldehyde                     | C <sub>7</sub> H <sub>6</sub> O <sub>3</sub><br>(3.93)                  | +      | +++    |                     |
| Alkaloid          | 15. | 3.28     | 144.045                | 116, 65               |                        |                                | Hydroxyquinoline                          | C <sub>9</sub> H <sub>7</sub> NO<br>(2.33)                              | +      | +++    |                     |
| Phenolic acid     | 16. | 3.46     | 167.0346               | 121, 109, 91, 65      |                        |                                | Homogentisic acid                         | C <sub>8</sub> H <sub>8</sub> O <sub>4</sub><br>(4.29)                  | +      | +++    |                     |
| Flavonoid         | 17. | 3.89645  | 289.071                | 123, 109              |                        |                                | (epi)catechin *                           | C <sub>15</sub> H <sub>14</sub> O <sub>6</sub><br>(1.7)                 | +      | +++    | <sup>1</sup> , GNPS |
| Phenolic acid     | 18. | 3.9727   | 183.0295               | 124, 78               |                        |                                | Methylgallate                             | C <sub>8</sub> H <sub>8</sub> O <sub>5</sub><br>(2.88)                  | +++    | +      |                     |
| Iridoid glycoside | 19. | 4.506358 | 403.1232               | 169, 124, 109, 59     |                        |                                | Hydroxygeniposide                         | C <sub>17</sub> H <sub>24</sub> O <sub>11</sub><br>(3.6)                | +      | +++    |                     |
| Phenolic acid     | 20. | 4.531775 | 359.0971               | 169, 124, 107, 85, 59 |                        |                                | Hydroxydimethoxy benzoic acid -O-hexoisde | C <sub>15</sub> H <sub>20</sub> O <sub>10</sub><br>(2.62)               | +      | +++    | 3                   |
| Phenolic acid     | 21. | 5.59     | 261.0066               | 151, 109              |                        |                                | Homovanillic acid 4-sulfate               | C <sub>9</sub> H <sub>10</sub> O <sub>7</sub> S<br>(2.9)                | -      | +      |                     |

| Compound class    | No. | Rt (min) | m/z [M-H] <sup>-</sup> | MS <sup>2</sup>         | m/z [M+H] <sup>+</sup>       | MS <sup>2</sup>                    | identification                    | Chemical formula                                       | CS-70% | CS_100 |   |
|-------------------|-----|----------|------------------------|-------------------------|------------------------------|------------------------------------|-----------------------------------|--------------------------------------------------------|--------|--------|---|
| Iridoid glycoside | 22. | 6.05     | 403.1232               | 169, 124, 109, 59       |                              |                                    | Hydroxy-geniposide isomer         | C <sub>17</sub> H <sub>24</sub> O <sub>11</sub> (3.38) | -      | +      |   |
| Aromatic          | 23. | 7.32     | 135.0446               | 91                      |                              |                                    | Hydroxyacetophenone               | C <sub>8</sub> H <sub>8</sub> O <sub>2</sub> (4.26)    | -      | +      |   |
| Phenolic acid     | 24. | 7.32     | 181.0503               | 109, 91, 65             |                              |                                    | dihydroxybenzoic acid ethyl ester | C <sub>9</sub> H <sub>10</sub> O <sub>4</sub> (2.1)    | -      | +      |   |
| Coumarin          | 25. | 8.42     | 177.0186               | 91, 89, 65              |                              |                                    | hydroxycoumarin                   | C <sub>9</sub> H <sub>6</sub> O <sub>4</sub> (2.52)    | +      | +++    |   |
| Phenolic acid     | 26. | 8.19     |                        |                         | 373.1487                     | 193, 179, 170                      | Syringin                          | C <sub>17</sub> H <sub>24</sub> O <sub>9</sub> (0.34)  | +      | +      |   |
| Phenolic acid     | 27. | 8.72     | 197.0452               | 124, 78                 |                              |                                    | Ethyl gallate                     | C <sub>9</sub> H <sub>10</sub> O <sub>5</sub> (1.72)   | +      | +++    |   |
| Lignan            | 28. | 8.75     | 521.1996               | 359, 344, 313, 241, 109 |                              |                                    | Isolariciresinol -O-hexoside      | C <sub>26</sub> H <sub>34</sub> O <sub>11</sub> (6.04) | +      | +++    |   |
| Phenolic acid     | 29. | 8.92     | 517.1534               | 193, 175, 160, 134, 59  |                              |                                    | O-Feruloylsucrose,                | C <sub>22</sub> H <sub>30</sub> O <sub>14</sub> (5.79) | +      | +++    | 4 |
| Phenolic acid     | 30. | 9.13     |                        |                         | 439.1564 [M+Na] <sup>+</sup> | 307, 259                           | Phenylethyl-O-primeveroside       | C <sub>19</sub> H <sub>28</sub> O <sub>10</sub> (3.32) | +      | +      |   |
| Apocarotenoid     | 31. | 9.51     |                        |                         | 223.1319                     | 172, 162, 137, 105, 93, 77, 67, 55 | Dehydro-vomifoliol                | C <sub>13</sub> H <sub>18</sub> O <sub>3</sub> (4.77)  | -      | +      |   |
| Coumarin          | 32. | 9.56     | 191.0347               | 120, 104                |                              |                                    | methoxyhydroxy coumarin           | C <sub>10</sub> H <sub>8</sub> O <sub>4</sub> (3.57)   | +      | +++    |   |

| Compound class | No. | Rt (min) | m/z [M-H] <sup>-</sup> | MS <sup>2</sup>         | m/z [M+H] <sup>+</sup>          | MS <sup>2</sup>                     | identification                           | Chemical formula                                          | CS-70% | CS_100 |  |
|----------------|-----|----------|------------------------|-------------------------|---------------------------------|-------------------------------------|------------------------------------------|-----------------------------------------------------------|--------|--------|--|
| Coumarin       | 33. | 9.64     |                        |                         | 193.0486                        | 178, 150, 133, 122, 105, 94, 77, 66 | Methoxyhydroxy coumarin                  | C <sub>10</sub> H <sub>8</sub> O <sub>4</sub><br>(-7.32)  | +      | +      |  |
| Aromatic       | 34. | 9.87     |                        |                         | 439.1565<br>[M+Na] <sup>+</sup> | 307, 260                            | Phenylethyl- <i>O</i> -primeveroside     | C <sub>19</sub> H <sub>28</sub> O <sub>11</sub><br>(1.49) | +      | +      |  |
| Lignan         | 35. | 9.97     |                        |                         | 605.2188<br>[M+Na] <sup>+</sup> | 443, 203, 185                       | Lyoniresinyl - <i>O</i> -hexoside        | C <sub>28</sub> H <sub>38</sub> O <sub>13</sub><br>(3.89) | -      | +      |  |
| Phenolic acid  | 36. | 10.07    | 451.1224               | 169, 151, 124, 51       |                                 |                                     | <i>O</i> -Galloyl salidroside            | C <sub>21</sub> H <sub>24</sub> O <sub>11</sub><br>(5.29) | +      | +++    |  |
| Coumarin       | 37. | 10.27    |                        |                         | 223.0592                        | 207, 179, 162, 134, 107, 78         | dimethoxyhydroxy coumarin                | C <sub>11</sub> H <sub>10</sub> O <sub>5</sub><br>(3.69)  | +      | +++    |  |
| Flavonoid      | 38. | 10.42    | 303.05                 | 151, 125, 57            |                                 |                                     | taxifolin                                | C <sub>15</sub> H <sub>12</sub> O <sub>7</sub><br>(3.06)  | +      | +      |  |
| Phenolic acid  | 39. | 11.14    |                        |                         | 379.1358<br>[M+Na] <sup>+</sup> | 177, 162, 146, 121                  | Methylconiferin                          | C <sub>17</sub> H <sub>24</sub> O <sub>8</sub><br>(-0.56) | +      | +      |  |
| Iridoid        | 40. | 11.29    | 475.1801               | 205, 143, 131, 115, 101 |                                 |                                     | Kanokoside A                             | C <sub>21</sub> H <sub>32</sub> O <sub>12</sub><br>(3.53) | +      | +++    |  |
| Lignan         | 41. | 11.34    |                        |                         | 547.2136<br>[M+Na] <sup>+</sup> | 385, 247, 191                       | Isolariciresinol- <i>O</i> -hexoside     | C <sub>26</sub> H <sub>36</sub> O <sub>11</sub><br>(1.72) | +      | +      |  |
| Lignan         | 42. | 11.39    |                        |                         | 607.2347<br>[M+Na] <sup>+</sup> | 445, 189                            | bisdihydrosiringenin- <i>O</i> -hexoside | C <sub>28</sub> H <sub>40</sub> O <sub>13</sub><br>(3.29) | +      | +      |  |
| Iridoid        | 43. | 11.47    |                        |                         | 567.2393<br>[M+Na] <sup>+</sup> | 549, 387, 177                       | Agnucastoside B                          | C <sub>26</sub> H <sub>40</sub> O <sub>12</sub><br>(2.62) | +      | +      |  |

| Compound class      | No. | Rt (min) | m/z [M-H] <sup>-</sup> | MS <sup>2</sup>                   | m/z [M+H] <sup>+</sup> | MS <sup>2</sup>                      | identification                                                 | Chemical formula                                          | CS-70% | CS_100 |      |
|---------------------|-----|----------|------------------------|-----------------------------------|------------------------|--------------------------------------|----------------------------------------------------------------|-----------------------------------------------------------|--------|--------|------|
| Diterpene glycoside | 44. | 11.80    | 545.2566               | 501, 339, 321, 101                |                        |                                      | Canavaliocide                                                  | C <sub>26</sub> H <sub>42</sub> O <sub>12</sub><br>(5.68) | ++     | +      | 5    |
| Coumarin            | 45. | 11.95    |                        |                                   | 207.0639               | 191, 163, 151, 135, 119, 107, 91, 77 | Dimethoxycoumarine                                             | C <sub>11</sub> H <sub>10</sub> O <sub>4</sub><br>(5.88)  | +      | 0      |      |
| Lignan              | 46. | 11.95    | 581.2773               | 341, 113, 89                      |                        |                                      | Lyoniresinol <i>O</i> -hexoside,                               | C <sub>28</sub> H <sub>38</sub> O <sub>13</sub><br>(4.58) | +      | +++    |      |
| Phenolic acid       | 47. | 12.41    | 507.1118               | 285, 235, 193, 169, 151, 134, 123 |                        |                                      | trihydroxynaphthalene- <i>O</i> -[ <i>O</i> -galloyl] hexoside | C <sub>23</sub> H <sub>24</sub> O <sub>13</sub><br>(4.86) | +      | +++    | 6    |
| Flavonoid           | 48. | 12.63    | 287.055                | 125, 83, 57                       |                        |                                      | tetrahydroxyflavone                                            | C <sub>15</sub> H <sub>12</sub> O <sub>6</sub><br>(2.41)  | +      | ++++   | 6    |
| Lignan              | 49. | 13.22    | 523.2163               | 361, 346, 165, 122, 101, 59       |                        |                                      | Secoisolariciresinol <i>O</i> -glucoside                       | C <sub>26</sub> H <sub>36</sub> O <sub>11</sub><br>(4.12) | +      | +++    |      |
| Flavonoid           | 50. | 13.32    | 463.086                | 300, 271, 255, 243, 151           |                        |                                      | Quercetin- <i>O</i> -hexoside                                  | C <sub>21</sub> H <sub>20</sub> O <sub>12</sub><br>(3.5)  | +      | ++     | GNPS |

| Compound class | No. | Rt (min) | m/z [M-H] <sup>-</sup> | MS <sup>2</sup>                        | m/z [M+H] <sup>+</sup>          | MS <sup>2</sup>                                        | identification                                    | Chemical formula                                          | CS-70% | CS_100 |      |
|----------------|-----|----------|------------------------|----------------------------------------|---------------------------------|--------------------------------------------------------|---------------------------------------------------|-----------------------------------------------------------|--------|--------|------|
| Coumarin       | 51. | 13.42    |                        |                                        | 237.0753                        | 221, 201, 193, 176, 147, 133, 123, 103, 91, 78, 68, 53 | Trimethoxycoumarin                                | C <sub>12</sub> H <sub>12</sub> O <sub>5</sub><br>(1.64)  | -      | +      |      |
| Phenolic acid  | 52. | 13.63    |                        |                                        | 481.167<br>[M+Na] <sup>+</sup>  | 451, 349, 155                                          | allyl-methoxyphenyl<br>O-(O-pentosyl)<br>hexoside | C <sub>21</sub> H <sub>30</sub> O <sub>11</sub><br>(1.58) | -      | +      |      |
| Stilbene       | 53. | 13.83    | 389.1227               | 227, 185, 143                          |                                 |                                                        | Trihydroxy-stilbene-<br>O-hexoside                | C <sub>20</sub> H <sub>22</sub> O <sub>8</sub><br>(3.59)  | +      | +      |      |
| Iridoid        | 54. | 13.93    | 573.2527               | 499, 365, 347, 303, 161, 119, 113, 101 |                                 |                                                        | Jasnudifloside G                                  | C <sub>27</sub> H <sub>42</sub> O <sub>13</sub><br>(5.22) | +      | +++    |      |
| Terpene        | 55. | 14.08    | 543.242                | 525, 497, 335, 317, 101, 59            |                                 |                                                        | Cinnacaside                                       | C <sub>26</sub> H <sub>40</sub> O <sub>12</sub><br>(3.97) | +      | +++    |      |
| Flavonoid      | 56. | 14.11    | 435.1279               | 273, 167, 123                          |                                 |                                                        | phloretin-O-<br>glucoside                         | C <sub>21</sub> H <sub>24</sub> O <sub>10</sub><br>(2.99) | +      | ++++   | GNPS |
| Apocartanoid   | 57. | 14.29    |                        |                                        | 395.2027<br>[M+Na] <sup>+</sup> | 295, 233, 203, 173, 137                                | Blumenol C hexoside                               | C <sub>19</sub> H <sub>32</sub> O <sub>7</sub><br>(1.06)  | +      | +      |      |
| Flavonoid      | 58. | 15.00    | 507.1119               | 344, 329, 301, 273, 101, 71, 59        |                                 |                                                        | syringetin-O-<br>glucoside                        | C <sub>23</sub> H <sub>24</sub> O <sub>13</sub><br>(4.79) | +      | +++    |      |

| Compound class | No. | Rt (min)     | m/z [M-H] <sup>-</sup> | MS <sup>2</sup>           | m/z [M+H] <sup>+</sup>         | MS <sup>2</sup>                    | identification                                     | Chemical formula                                       | CS-70% | CS_100 |                     |
|----------------|-----|--------------|------------------------|---------------------------|--------------------------------|------------------------------------|----------------------------------------------------|--------------------------------------------------------|--------|--------|---------------------|
| Phenolic acid  | 59. | 15.35        | 461.0703               | 328, 312, 297, 285, 269   |                                |                                    | <i>O</i> -Methylellagic acid- <i>O</i> -rhamnoside | C <sub>21</sub> H <sub>18</sub> O <sub>12</sub> (3.85) | +      | ++ +   |                     |
| Lignan         | 60. | 15.66        | 357.1329               | 161, 122, 83, 55          | 359.1483                       | 137                                | Matairesinol                                       | C <sub>20</sub> H <sub>22</sub> O <sub>6</sub> (2.88)  | +      | +++    |                     |
| Apocarotenoid  | 61. | 15.81        |                        |                           | 209.1529                       | 151, 133, 121, 105, 91, 81, 67, 55 | Oxo-dihydro-ionone                                 | C <sub>13</sub> H <sub>20</sub> O <sub>2</sub> (3.36)  | -      | +      |                     |
| Apocarotenoid  | 62. | 15.91        |                        |                           | 233.1503<br>M+Na] <sup>+</sup> | 181, 147, 128, 115, 105, 77, 67    | Blumenol C                                         | C <sub>13</sub> H <sub>22</sub> O <sub>2</sub> (3.23)  | +      | +      |                     |
| Apocarotenoid  | 63. | 15.91        |                        |                           | 193.1579                       | 135, 123, 107, 91, 77, 67, 55      | Damascone                                          | C <sub>13</sub> H <sub>20</sub> O (3.55)               | -      | +      |                     |
| Apocarotenoid  | 64. | 16.07        |                        |                           | 233.1507<br>M+Na] <sup>+</sup> | 181, 147, 128, 115, 105, 77, 67    | Blumenol C                                         | C <sub>13</sub> H <sub>22</sub> O <sub>2</sub> (3.23)  | -      | +      |                     |
| Stilbene       | 65. | 16.324<br>03 | 535.1583               | 227, 163, 146             |                                |                                    | piceid-2''- <i>O</i> -coumarate                    | C <sub>29</sub> H <sub>28</sub> O <sub>10</sub> (5.28) | -      | +      |                     |
| Flavonoid      | 66. | 16.47        | 315.086                | 125, 57                   |                                |                                    | Di- <i>O</i> -methyl aromadendrin                  | C <sub>17</sub> H <sub>16</sub> O <sub>6</sub> (4.42)  | -      | +      |                     |
| Flavonoid      | 67. | 16.57        | 301.0339               | 151, 121, 107, 93, 83, 59 |                                |                                    | Quercetin*                                         | C <sub>15</sub> H <sub>10</sub> O <sub>7</sub> (3.71)  | +      | +++    | <sup>1</sup> , GNPS |

| Compound class | No. | Rt (min) | m/z [M-H] <sup>-</sup> | MS <sup>2</sup>                        | m/z [M+H] <sup>+</sup> | MS <sup>2</sup>                    | identification                        | Chemical formula                                         | CS-70% | CS_100 |      |
|----------------|-----|----------|------------------------|----------------------------------------|------------------------|------------------------------------|---------------------------------------|----------------------------------------------------------|--------|--------|------|
| Flavonoid      | 68. | 16.62    | 271.0603               | 151, 119, 107, 93, 83, 59              |                        |                                    | Trihydroxy flavanone                  | C <sub>15</sub> H <sub>12</sub> O <sub>5</sub> (1.86)    | +      | +++    | GNPS |
| Apocarotenoid  | 69. | 16.78    |                        |                                        | 211.1687               | 211, 138, 123, 111, 93, 81, 67, 55 | Trimethyl-4-(3-oxobutyl)cyclohexanone | C <sub>13</sub> H <sub>22</sub> O <sub>2</sub> (2.94)    | -      | +      |      |
| Flavonoid      | 70. | 17.26    | 285.0395               | 175, 151, 133, 107, 65                 |                        |                                    | Luteolin                              | C <sub>15</sub> H <sub>10</sub> O <sub>6</sub> (3.04)    | +      | +      | GNPS |
| Flavonoid      | 71. | 18.84    | 409.0216               | 314, 299, 271                          |                        |                                    | Quercetin dimethyl ether sulphate     | C <sub>17</sub> H <sub>14</sub> O <sub>10</sub> S (4.71) | +++    | +      |      |
| Flavonoid      | 72. | 18.97    | 329.0657               | 229, 271, 243, 227, 161                |                        |                                    | Tricin                                | C <sub>17</sub> H <sub>14</sub> O <sub>7</sub> (-4.7)    | +      | +++    | GNPS |
| Phenolic acid  | 73. | 19.27    | 343.0451               | 312, 297, 285, 269, 241, 213, 197, 185 |                        |                                    | Trimethoxy-ellagic acid               | C <sub>17</sub> H <sub>12</sub> O <sub>8</sub> (-4.07)   | +      | +++    |      |

1. D. Donno, G. L. Beccaro, M. G. Mellano, L. Bonvegna, G. J. J. o. t. S. o. F. Bounous and Agriculture, 2014, **94**, 2863-2873.
2. F. S. Tareq, R. R. Kotha, S. Natarajan, J. Sun and D. L. J. M. Luthria, 2023, **28**, 5507.
3. M. Kisiriko, C. Noleto-Dias, G. T. Bitchagno, I. Naboulsi, M. Anastasiadi, L. A. Terry, M. Sobeh, M. H. Beale, J. L. J. C. Ward and Biodiversity, 2024, e202400396.
4. T. Chen, X. Zhou, M. Zhu, X. Chen, D. Chang, Y. Lin, W. Xu, Y. Zheng, S. Li and J. J. J. o. E. Song, 2024, **333**, 118418.
5. I. Hurtado-Díaz, M. Á. Ramírez-Cisneros, L. Alvarez, J. N. Sánchez-Carranza, M. C. Columba-Palomares, J. A. Silva-Guzmán, F. Cruz-Sosa, A. J. C. Bernabé-Antonio and Biodiversity, 2024, **21**, e202301474.
6. A. V. Faleva, N. V. Ul'yanovskii, A. A. Onuchina, D. I. Falev and D. S. J. M. Kosyakov, 2023, **13**, 598.
